# Supplementary material
Source: Springer Nature journal article supplement (https://www.springermedizin.de/resource/supplementary/12884_2014_980_MOESM1_ESM.pdf/9458688)
Supplement: MOESM1 [file 9458688]

Pregnancy

Postpartum

Randomization

Intervention regions  
n=5

Intervention group  
n=1250

Expert centers (n=5)

Control regions  
n=5

Control group  
n=1250

Data from maternity cards (weight gain, complications)

Data from WBCBs

Screening & Recruitment

V0

V1

V2

V3

V4

≤12<sup>th</sup>  
Wk gest

12<sup>th</sup>-16<sup>th</sup>  
Wk gest

16<sup>th</sup>-20<sup>th</sup>  
Wk gest

24<sup>th</sup>-28<sup>th</sup>  
Wk gest

30<sup>th</sup>-34<sup>th</sup>  
Wk gest

Birth

6<sup>th</sup>-8<sup>th</sup>  
week

1<sup>st</sup>  
year

2<sup>nd</sup>-5<sup>th</sup>  
year

Q1

OGTT

HbA1c

Q2

Birth  
record

Q3

TEL

TEL

Abbreviations: V = Visit, Wk gest = Weeks of gestation, OGTT = Oral glucose tolerance test, TEL = Telephone call, WBCB = Well baby check-up booklet, Q = Questionnaire
